# Supplementary material for: Modulation of Alveolar Macrophages by Postimmunobiotics: Impact on TLR3-Mediated Antiviral Respiratory Immunity
Source: MDPI journal article supplement (doi:10.3390/cells11192986), 2022-09-25
Supplement: s1 [file s1]

Table S1. Primer sequences for RT-qPCR in porcine alveolar macrophages

| Target                           | Forward primer            | Reverse primer           |
|----------------------------------|---------------------------|--------------------------|
| <i>IFN-<math>\alpha</math></i>   | CAGGGCAGAAGTCATGAGATCC    | ATGAACCAGGTGTCTGTCACTC   |
| <i>IFN-<math>\beta</math></i>    | AGTTGCCTGGGACTCCTCAA      | CCTCAGGGACCTCAAAGTTCAT   |
| <i>IFN-<math>\lambda</math>1</i> | CCTTAGAGGCTGAGCTAGACTTGAC | AGCCTGAAGTTCGACGTGGATG   |
| <i>IFN-<math>\lambda</math>3</i> | GTTCAAGTCTCTGTCCCCACAAG   | CTCCAAGAGGGACTCTTCAAAGG  |
| <i>RNase L</i>                   | AGTGGACAATAAGATTGACAG     | GTAGACATACATGACCAGATCG   |
| <i>Mx1</i>                       | GAGGTGGACCCCGAAGGA        | CACCAGATCCGGCTTCGT       |
| <i>Mx2</i>                       | AATCATCACCAGGTGTCCGC      | CTTTGCGTATTTCCCGCTCC     |
| <i>MDA-5</i>                     | GCTACGTGAACCCCGATCTC      | AAGCTTGTCCACCACTGTAGG    |
| <i>RIG-I</i>                     | TATCCGAGCAGCAGGCTTTG      | CTCGTTGCTGGGATCTATGGAA   |
| <i>PKR</i>                       | CCCTGCACTTCTAGCCATCT      | CGACCACTGGCCATTTCTTTC    |
| <i>IL-6</i>                      | TGGATAAGCTGCAGTCACAG      | ATTATCCGAATGGCCCTCAG     |
| <i>MCP-1</i>                     | ACAGAAGAGTCACCAGCAGCAA    | GCCCGCGATGGTCTTG         |
| <i>Tollip</i>                    | TACCGTGGGCCGTCTCA         | CCGTAGTTCTTCGCCAACTTG    |
| <i>A20</i>                       | CCTCCCTGAAAAGCCAGAA       | GTGCCACAAGCTTCCTCACTT    |
| <i>MKP-1</i>                     | TCCGAATCCACTGGGTTCC       | ATGTTGGTCCCCAATGTGCT     |
| <i>Bcl-3</i>                     | CGACGCGGTGGAC. ATTAAG     | ACCATGCTAAGGCTGTTGTTTTTC |
| <i>SIGIRR</i>                    | ATGTGAAGTGTCGGCTCAATGT    | TTCATCTCCACCTCCCCATACT   |
| <i>IRAK-M</i>                    | TGGAGCAGCCTTGAATCCTT      | TGGATAACACGTTTGGGAATCTT  |
| <i><math>\beta</math>-actin</i>  | CATCACCATCGGCAACGA        | GCGTAGAGGTCCTTCCTGATGT   |
