# Supplementary material for: Modulation of Alveolar Macrophages by Postimmunobiotics: Impact on TLR3-Mediated Antiviral Respiratory Immunity
Source: MDPI journal article supplement (doi:10.3390/cells11192986), 2022-09-25
Supplement: s1 [file s1]

Table S2. Lactic acid bacteria strains used in this work.

|    | <b>Organism name</b>         | <b>Strain</b> | <b>Origin</b> |
|----|------------------------------|---------------|---------------|
| 1  | <i>Lactobacillus gasseri</i> | TMT1          | Human feces   |
| 2  | <i>Lactobacillus gasseri</i> | TMT2          | Human feces   |
| 3  | <i>Lactobacillus gasseri</i> | TMT3          | Human feces   |
| 4  | <i>Lactobacillus gasseri</i> | TMT4          | Human feces   |
| 5  | <i>Lactobacillus gasseri</i> | TMT5          | Human feces   |
| 6  | <i>Lactobacillus gasseri</i> | TMT6          | Human feces   |
| 7  | <i>Lactobacillus gasseri</i> | TMT7          | Human feces   |
| 8  | <i>Lactobacillus gasseri</i> | TMT8          | Human feces   |
| 9  | <i>Lactobacillus gasseri</i> | TMT9          | Human feces   |
| 10 | <i>Lactobacillus gasseri</i> | TMT11         | Human feces   |
| 11 | <i>Lactobacillus gasseri</i> | TMT12         | Human feces   |
| 12 | <i>Lactobacillus gasseri</i> | TMT13         | Human feces   |
| 13 | <i>Lactobacillus gasseri</i> | TMT14         | Human feces   |
| 14 | <i>Lactobacillus gasseri</i> | TMT15         | Human feces   |
| 15 | <i>Lactobacillus gasseri</i> | TMT16         | Human feces   |
| 16 | <i>Lactobacillus gasseri</i> | TMT17         | Human feces   |
| 17 | <i>Lactobacillus gasseri</i> | TMT18         | Human feces   |
| 18 | <i>Lactobacillus gasseri</i> | TMT19         | Human feces   |
| 19 | <i>Lactobacillus gasseri</i> | TMT20         | Human feces   |
| 20 | <i>Lactobacillus gasseri</i> | TMT21         | Human feces   |
| 21 | <i>Lactobacillus gasseri</i> | TMT22         | Human feces   |
| 22 | <i>Lactobacillus gasseri</i> | TMT23         | Human feces   |
| 23 | <i>Lactobacillus gasseri</i> | TMT24         | Human feces   |
| 24 | <i>Lactobacillus gasseri</i> | TMT25         | Human feces   |
| 25 | <i>Lactobacillus gasseri</i> | TMT26         | Human feces   |
| 26 | <i>Lactobacillus gasseri</i> | TMT27         | Human feces   |
| 27 | <i>Lactobacillus gasseri</i> | TMT28         | Human feces   |
| 28 | <i>Lactobacillus gasseri</i> | TMT29         | Human feces   |
| 29 | <i>Lactobacillus gasseri</i> | TMT31         | Human feces   |
| 30 | <i>Lactobacillus gasseri</i> | TMT32         | Human feces   |
| 31 | <i>Lactobacillus gasseri</i> | TMT34         | Human feces   |
| 32 | <i>Lactobacillus gasseri</i> | TMT35         | Human feces   |
| 33 | <i>Lactobacillus gasseri</i> | TMT36         | Human feces   |
| 34 | <i>Lactobacillus gasseri</i> | TMT38         | Human feces   |
| 35 | <i>Lactobacillus gasseri</i> | TMT39         | Human feces   |
| 36 | <i>Lactobacillus gasseri</i> | TMT40         | Human feces   |
